# Supplementary material for: NY-ESO-1 antigen expression and immune response are associated with poor prognosis in MAGE-A4-vaccinated patients with esophageal or head/neck squamous cell carcinoma
Source: PubMed Central journal article supplement (PMC6267599; doi:10.18632/oncotarget.26323), 2018-11-13
Supplement: oncotarget-09-35997-s001.pdf [file oncotarget-09-35997-s001.pdf]

## NY-ESO-1 antigen expression and immune response are associated with poor prognosis in MAGE-A4-vaccinated patients with esophageal or head/neck squamous cell carcinoma

### SUPPLEMENTARY MATERIALS

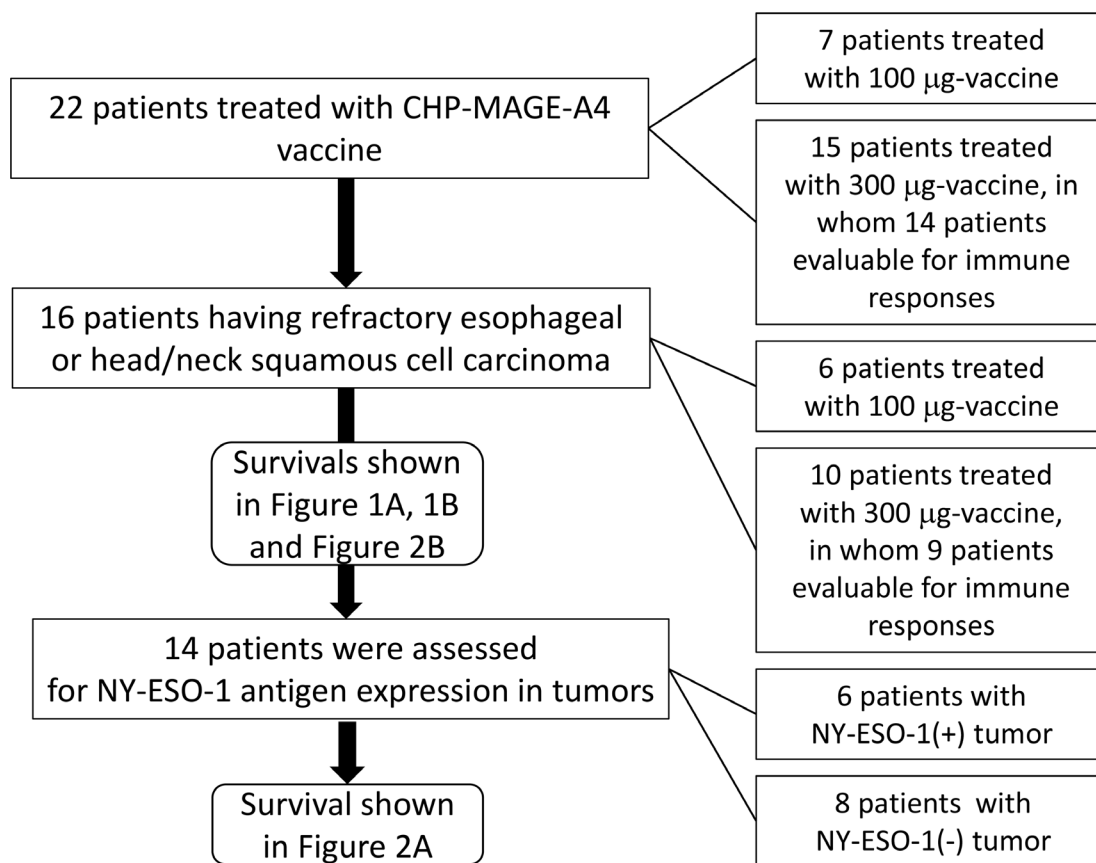

**Supplementary Figure 1: Study profile.** A total of 22 patients were enrolled to the clinical trial. Seven and 15 patients were treated with 100 µg-dose and 300 µg-dose of CHP-MAGE-A4, respectively, in whom 14 patients in the 300 µg-dose were evaluable for immune responses. 18 had esophageal or head/neck squamous cell carcinoma. Among them, 16 patients had refractory tumors, and 2 had no tumors after the first-line therapy. We evaluated the 16 patients with refractory esophageal or head/neck squamous cell carcinoma for survival analysis. The 14 patients were assessed for NY-ESO-1 antigen expression in the tumor tissues.

**Supplementary Table 1: Coexpression of NY-ESO-1 antigen in MAGE-A4 antigen-expressing tumors**

| pt No. | code No. | MAGE-A4 (PCR) | PCR copy number for MAGE-A4 | NY-ESO-1 (PCR) | PCR copy number for NY-ESO-1 | pt No | code No | MAGE-A4 (IHC) | IHC positivity for MAGE-A4(strength)   | NY-ESO-1 (IHC) | IHC positivity (strength) |
|--------|----------|---------------|-----------------------------|----------------|------------------------------|-------|---------|---------------|----------------------------------------|----------------|---------------------------|
| 1      | 766      | +             | 1171                        | -              | 0                            | 12    | KIT-5   | +             | MCV-1 90%(weak)<br>MCV-4 95%(weak)     | +              | 5%(weak)                  |
| 2      | 630      | +             | 320.85                      | +              | 1.84                         | 13    | KIT-8   | +             | MCV-1 30%(moderate)<br>MCV-4 30%(weak) | +              | 30%(moderate)             |
| 3      | 887      | +*            | 57B 60%<br>MCV-1 40%        | -*             | nt                           | 14    | KIT-9   | +**           | 15459.5**                              | -              | negative                  |
| 4      | 698      | +             | 55.3                        | -              | 0                            | 15    | KIT-10  | +             | NA                                     | -              | negative                  |
| 5      | 687      | +             | 864                         | -              | 0                            | 16    | KIT-11  | +             | NA                                     | NA             | NA                        |
| 6      | 998      | +             | 900.3                       | -              | 0                            | 17    | KIT-12  | +             | NA                                     | +              | 30%(moderate)             |
| 7      | 1147     | +             | 4558.8                      | -              | 0                            | 18    | KIT-13  | +             | MCV-1 2%(weak)<br>MCV-4 20%(weak)      | +              | 70%(strong)               |
| 8      | 1358     | +             | 375.1                       | -              | 0                            | 19    | KIT-14  | +**           | 103.5                                  | -              | negative                  |
| 9      | 1188     | +*            | 5                           | -              | 0                            | 20    | KIT-15  | +             | MCV-1 30%(weak)<br>MCV-4 negative      | +              | 5%(weak)                  |
| 10     | 704      | +             | 2880.32                     | +              | 10.25                        | 21    | KIT-16  | +             | NA                                     | -              | negative                  |
| 11     | NMC001   | +*            | NA                          | NA             | NA                           | 22    | KIT-17  | +**           | 949.8                                  | -              | negative                  |

\*tested by IHC, \*\*tested by PCR.

IHC, immunohistochemistry NA, not available.
